# Supplementary material for: Micronutrient Status of Critically Ill Patients with COVID-19 Pneumonia
Source: MDPI journal article supplement (doi:10.3390/nu16030385), 2024-01-29
Supplement: s1 [file s1]

### Supplementary File S3 - Prevalence of deficiency

| Vitamin A (<1.2 µmol/L) |          |        |        |        |
|-------------------------|----------|--------|--------|--------|
|                         | Baseline | Week 1 | Week 2 | Week 3 |
| AMC                     | 100%     | 30%    | 30%    | 20%    |
| VUmc                    | 100%     | 70%    | 10%    | 30%    |
| Controls                | 0% (0/5) |        |        |        |

| Vitamin B6 (<35 nmol/L) |            |        |        |        |
|-------------------------|------------|--------|--------|--------|
|                         | Baseline   | Week 1 | Week 2 | Week 3 |
| AMC                     | 80%        | 90%    | 100%   | 80%    |
| VUmc                    | 100%       | 80%    | 80%    | 90%    |
| Controls (n=3)          | 100% (3/3) |        |        |        |

| Vitamin D (<50 nmol/L) |           |        |        |        |
|------------------------|-----------|--------|--------|--------|
|                        | Baseline  | Week 1 | Week 2 | Week 3 |
| AMC                    | 70%       | 50%    | 60%    | 60%    |
| VUmc                   | 70%       | 70%    | 70%    | 70%    |
| Controls               | 60% (3/5) |        |        |        |

| Vitamin E (<15 µmol/L) |          |        |        |        |
|------------------------|----------|--------|--------|--------|
|                        | Baseline | Week 1 | Week 2 | Week 3 |
| AMC                    | 10%      | 0%     | 10%    | 0%     |
| VUmc                   | 10%      | 10%    | 10%    | 0%     |
| Controls               | 0% (0/5) |        |        |        |

| Iron (<11 µmol/L) |           |        |        |        |
|-------------------|-----------|--------|--------|--------|
|                   | Baseline  | Week 1 | Week 2 | Week 3 |
| AMC               | 90%       | 100%   | 90%    | 100%   |
| VUmc              | 100%      | 100%   | 90%    | 90%    |
| Controls          | 40% (2/5) |        |        |        |

| Transferrin (<1.6 g/L) |          |        |        |        |
|------------------------|----------|--------|--------|--------|
|                        | Baseline | Week 1 | Week 2 | Week 3 |
| AMC                    | 70%      | 70%    | 50%    | 60%    |
| VUmc                   | 90%      | 80%    | 50%    | 30%    |
| Controls               | 0% (0/5) |        |        |        |

| Zinc (<10 µmol/L) |          |        |        |        |
|-------------------|----------|--------|--------|--------|
|                   | Baseline | Week 1 | Week 2 | Week 3 |
| AMC               | 80%      | 60%    | 30%    | 10%    |
| VUmc              | 70%      | 70%    | 50%    | 30%    |
| Controls          | 0% (0/5) |        |        |        |

| Selenium (<0.70 µmol/L) |          |        |        |        |
|-------------------------|----------|--------|--------|--------|
|                         | Baseline | Week 1 | Week 2 | Week 3 |
| AMC                     | 50%      | 30%    | 10%    | 0%     |
| VUmc                    | 60%      | 0%     | 0%     | 0%     |
| Controls                | 0% (0/5) |        |        |        |

| Copper (<10 µmol/L) |          |        |        |        |
|---------------------|----------|--------|--------|--------|
|                     | Baseline | Week 1 | Week 2 | Week 3 |
| AMC                 | 0%       | 0%     | 0%     | 0%     |
| VUmc                | 0%       | 0%     | 0%     | 0%     |
| Controls            | 0% (0/5) |        |        |        |
