# Supplementary material for: Micronutrient Status of Critically Ill Patients with COVID-19 Pneumonia
Source: MDPI journal article supplement (doi:10.3390/nu16030385), 2024-01-29
Supplement: s1 [file s1]

## Supplementary File S1

### Enteral nutrition AMC

Peptamen® Intense: [Peptamen Intense | Target Nutrition App from Nestlé](#)

### Enteral nutrition VUmc

Peptamen® Intense: [Peptamen Intense | Target Nutrition App from Nestlé](#)

Peptamen® HN: [Peptamen HN Peptide Feed | Nestlé Health Science \(nestlehealthscience.co.uk\)](#)

Fresubin® 2 KCAL HP: [Fresubin® 2 KCAL HP \(FIBRE\) - Fresenius Kabi Netherlands \(fresenius-kabi.com\)](#)

Nutrison® Advanced Protison: [Nutrison Protein Advance \(nutricia.co.uk\)](#)

Nutrison® Protein Intense: [Nutrison Protein Intense \(nutricia.co.uk\)](#)

Nutrison® Protein Plus: [Nutrison Protein Plus \(nutricia.co.uk\)](#)

### Daily administration of additional micronutrients in VUmc

| Table 1: Cemevit |             |
|------------------|-------------|
| Vitamin A        | 3500 IU     |
| Biotin           | 69 µg       |
| Folic acid       | 414 µg      |
| Vitamin B12      | 6 µg        |
| Thiamine         | 3.51 mg     |
| Riboflavin       | 4.14 mg     |
| Vitamin B6       | 4.53 mg     |
| Panthenic acid   | 17.25 mg    |
| Vitamin C        | 125 mg      |
| Vitamin D        | 220 IU (D3) |
| Vitamin E        | 10.2 mg     |

| Table 2: Supliven                |          |
|----------------------------------|----------|
| Chlorium chloride hexahydrate    | 53.3 µg  |
| Potassium iodide                 | 166 µg   |
| Copper chloride dihydrate        | 1.0 mg   |
| Manganese chloride tetra hydrate | 0.198 mg |
| Sodium fluoride                  | 2.1 mg   |
| Sodium molybdate dihydrate       | 48.5 µg  |
| Sodium selenite anhydrate        | 173 µg   |
| Ferric chloride hexahydrate      | 5.4 mg   |
| Zinc chloride                    | 10.5 mg  |

| Table 3: Supradyn complex forte |        |
|---------------------------------|--------|
| Vitamin A                       | 800 µg |
| Vitamin B1                      | 3,3 mg |
| Vitamin B2                      | 4,2 mg |
| Vitamin B3                      | 48 mg  |
| Vitamin B5                      | 18 mg  |
| Vitamin B6                      | 2 mg   |
| Vitamin B8                      | 50 µg  |
| Folic acid                      | 200 µg |
| Vitamin B12                     | 3 µg   |
| Vitamin C                       | 180 mg |
| Vitamin D                       | 5 µg   |
| Vitamin E                       | 12 mg  |
| Vitamin K                       | 25 µg  |
| Calcium                         | 120 mg |
| Iron                            | 14 mg  |
| Jodine                          | 150 µg |
| Copper                          | 1 mg   |
| Magnesium                       | 80 mg  |
| Manganese                       | 2 mg   |
| Molybdenum                      | 50 µg  |
| Selenium                        | 50 µg  |
| Zinc                            | 10 mg  |
